# Supplementary material
Source: PubMed Central journal article supplement (PMC8238389)
Supplement: NIHMS1639364-supplement-sm.pdf [file NIHMS1639364-supplement-sm.pdf]

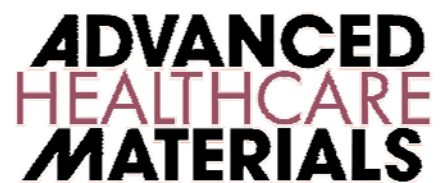

## Supporting Information

for *Adv. Healthcare Mater.*, DOI: 10.1002/adhm.202001111

### Sequential Protein Capture in Multiplex Single Molecule Arrays: A Strategy for Eliminating Assay Cross-Reactivity

*Tal Gilboa, Adam M. Maley, Alana F. Ogata, Connie Wu, David R. Walt\**

# Supporting Information

## Sequential Protein Capture in Multiplex Single Molecule Arrays: A Strategy for Eliminating Assay Cross-Reactivity

Tal Gilboa, Adam M. Maley, Alana F. Ogata, Connie Wu, David R. Walt\*

**Table S1. Assay Limits of Detection and 4 PL Fitting Parameters.** Calibration curves were fit to a 4-parameter logistic (4 PL) regression (Eq. S1) with  $1/y^2$  weighting using GraphPad Prism version 8.3.

| Assay Format         | Marker | A       | B     | C         | D       | R <sup>2</sup> | LOD (pg/mL) |
|----------------------|--------|---------|-------|-----------|---------|----------------|-------------|
| Standard Multiplex   | IL-7   | 0.00197 | 1.024 | 3,065,000 | 504,000 | 0.984          | 0.0022      |
| Standard Multiplex   | IL-8   | 0.00434 | 0.958 | 532.7     | 43.0    | 0.997          | 0.0051      |
| Standard Multiplex   | IL-10  | 0.00765 | 0.998 | 219.9     | 98.0    | 0.998          | 0.0021      |
| Sequential Multiplex | IL-7   | 0.00218 | 1.027 | 7,102,000 | 813,000 | 0.985          | 0.0148      |
| Sequential Multiplex | IL-8   | 0.00290 | 0.969 | 4,082,000 | 233,000 | 0.998          | 0.0207      |
| Sequential Multiplex | IL-10  | 0.00628 | 0.979 | 274.0     | 68.0    | 0.999          | 0.0035      |

### Equation 1: 4-Parameter Logistic Regression

$$Y(x) = D + \frac{A - D}{1 + \left(\frac{x}{C}\right)^B}$$

## Sequential Multiplex Assay Validation

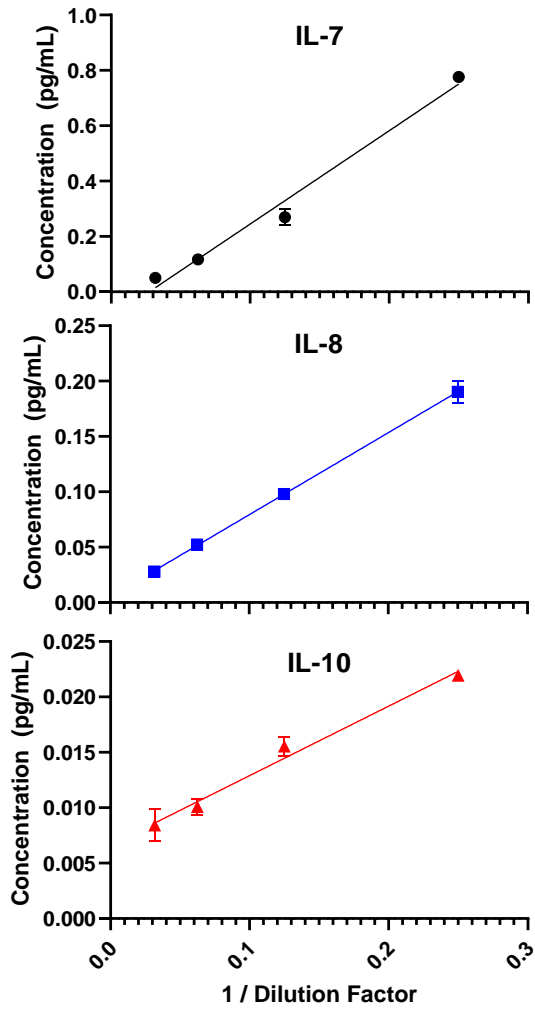

**Figure S1. Sequential Multiplex Assay Dilution Linearity.** Data for each marker were fit by linear regression. The  $R^2$  value for each fit was 0.9816 for IL-7, 0.9961 for IL-8, and 0.9712 for IL-10. Error bars represent the standard deviations of duplicate measurements. Some error bars are narrow and encompassed within the data point.

**Table S2. Sequential Multiplex Assay Spike and Recovery.** % Recoveries were calculated by subtracting the measured endogenous protein concentration in a plasma sample with no spiked recombinant protein from the measured protein concentration of plasma samples with spiked recombinant protein, and then dividing by the spiked protein concentration and multiplying by 100. CVs are the coefficients of variation of the measured spiked plasma samples, which were performed in duplicates.

| Spiked Protein | IL-7                 |       | IL-8                 |       | IL-10                |       |
|----------------|----------------------|-------|----------------------|-------|----------------------|-------|
|                | Average Recovery (%) | CV    | Average Recovery (%) | CV    | Average Recovery (%) | CV    |
| 50 pg/mL       | 95.1                 | 0.15  | 100.3                | 0.053 | 86.2                 | 0.092 |
| 5 pg/mL        | 78.9                 | 0.006 | 90.6                 | 0.076 | 75.9                 | 0.069 |
| 0.5 pg/mL      | 89.2                 | 0.048 | 88.9                 | 0.041 | 93.1                 | 0.083 |

**Table S3. Cross-reactivity Analysis of Protein Dropout Experiments.** Values displayed are the signal AEB divided by the background AEB (0 pg/mL sample).

| <b>Standard Multiplex</b>   |                          |            |            |            |           |            |            |            |           |
|-----------------------------|--------------------------|------------|------------|------------|-----------|------------|------------|------------|-----------|
| <b>Bead</b>                 | IL-7                     | IL-7       | IL-7       | IL-8       | IL-8      | IL-8       | IL-10      | IL-10      | IL-10     |
| <b>Protein</b>              | IL-7                     | IL-8       | IL-10      | IL-7       | IL-8      | IL-10      | IL-7       | IL-8       | IL-10     |
|                             | On target                | Off target | Off target | Off target | On target | Off target | Off target | Off target | On target |
| <b>Conc. (pg/mL)</b>        | <b>Signal/Background</b> |            |            |            |           |            |            |            |           |
| <b>0</b>                    | 1.00                     | 1.00       | 1.00       | 1.00       | 1.00      | 1.00       | 1.00       | 1.00       | 1.00      |
| <b>0.0244</b>               | 3.58                     | 2.02       | 1.78       | 0.96       | 1.36      | 1.01       | 0.98       | 1.19       | 2.18      |
| <b>0.0977</b>               | 9.13                     | 1.69       | 1.31       | 1.00       | 2.60      | 1.02       | 0.86       | 0.92       | 5.80      |
| <b>0.391</b>                | 35.6                     | 2.04       | 1.83       | 1.15       | 8.16      | 0.89       | 0.92       | 0.87       | 19.6      |
| <b>1.5625</b>               | 134                      | 2.67       | 2.73       | 0.97       | 29.7      | 1.32       | 0.99       | 1.00       | 72.7      |
| <b>6.25</b>                 | 525                      | 2.75       | 3.33       | 1.83       | 113       | 1.97       | 1.52       | 1.08       | 326       |
| <b>25</b>                   | 2560                     | 3.84       | 8.68       | 3.06       | 496       | 2.95       | 2.46       | 1.42       | 1295      |
| <b>80</b>                   | 10400                    | 11.1       |            | 6.47       | 1497      |            | 5.94       | 2.20       |           |
| <b>100</b>                  |                          |            | 79.9       |            |           | 28.9       |            |            | 4280      |
| <b>200</b>                  | 27500                    | 38.3       |            | 52.0       | 4460      |            | 28.1       | 11.1       |           |
| <b>400</b>                  |                          | 59.8       |            |            | 6420      |            |            | 15.6       |           |
| <b>Sequential Multiplex</b> |                          |            |            |            |           |            |            |            |           |
| <b>Bead</b>                 | IL-7                     | IL-7       | IL-7       | IL-8       | IL-8      | IL-8       | IL-10      | IL-10      | IL-10     |
| <b>Protein</b>              | IL-7                     | IL-8       | IL-10      | IL-7       | IL-8      | IL-10      | IL-7       | IL-8       | IL-10     |
|                             | On target                | Off target | Off target | Off target | On target | Off target | Off target | Off target | On target |
| <b>Conc. (pg/mL)</b>        | <b>Signal/Background</b> |            |            |            |           |            |            |            |           |
| <b>0</b>                    | 1.00                     | 1.00       | 1.00       | 1.00       | 1.00      | 1.00       | 1.00       | 1.00       | 1.00      |
| <b>0.0244</b>               | 1.78                     | 0.94       | 1.06       | 1.08       | 1.55      | 0.88       | 0.68       | 0.63       | 1.37      |
| <b>0.0977</b>               | 4.04                     | 0.87       | 1.08       | 1.32       | 3.02      | 0.96       | 0.70       | 0.62       | 3.32      |
| <b>0.391</b>                | 13.7                     | 1.10       | 1.08       | 1.02       | 9.25      | 0.85       | 0.64       | 0.71       | 11.5      |
| <b>1.5625</b>               | 47.8                     | 1.27       | 0.97       | 1.02       | 32.5      | 0.99       | 0.68       | 0.60       | 39.7      |
| <b>6.25</b>                 | 191                      | 0.83       | 0.94       | 1.03       | 127       | 0.84       | 0.67       | 0.69       | 158       |
| <b>25</b>                   | 938                      | 0.87       | 0.89       | 0.92       | 529       | 0.93       | 0.66       | 0.69       | 573       |
| <b>80</b>                   | 3070                     | 0.79       | 0.67       | 0.97       | 1520      | 0.96       | 0.69       | 0.65       | 1730      |
| <b>200</b>                  | 7950                     | 0.61       |            | 0.75       | 3960      |            | 0.65       | 0.62       |           |
| <b>400</b>                  |                          | 0.61       |            |            | 6240      |            |            | 0.71       |           |
